# Supplementary material for: Potential of optical and ecological proxies to quantify phytoplankton carbon in oligotrophic waters
Source: Copernicus journal article supplement (doi:10.5194/egusphere-2025-3993), 2025-08-29
Supplement: Supplementary file 1 [file egusphere-2025-3993-supplement.pdf]

1 *Supporting Information for:*

2 **Potential of optical and ecological proxies to quantify phytoplankton**  
3 **carbon in oligotrophic waters**

4 David Antoine<sup>1,2</sup>, Chandanlal Parida<sup>1</sup>, Camille Grimaldi<sup>3</sup>

5

6 <sup>1</sup> Remote Sensing and Satellite Research Group, School of Earth & Planetary Sciences, Curtin University, Perth, Australia

7 <sup>2</sup> Sorbonne Université, CNRS, Laboratoire d'Océanographie de Villefranche, Villefranche sur mer 06230, France

8 <sup>3</sup> University of Western Australia, Indian Ocean Marine Research Centre, Fairway, Crawley, WA 6009

9

10

11

12 *Correspondence to:* Chandanlal Parida (Chandan.parida@curtin.edu.au)

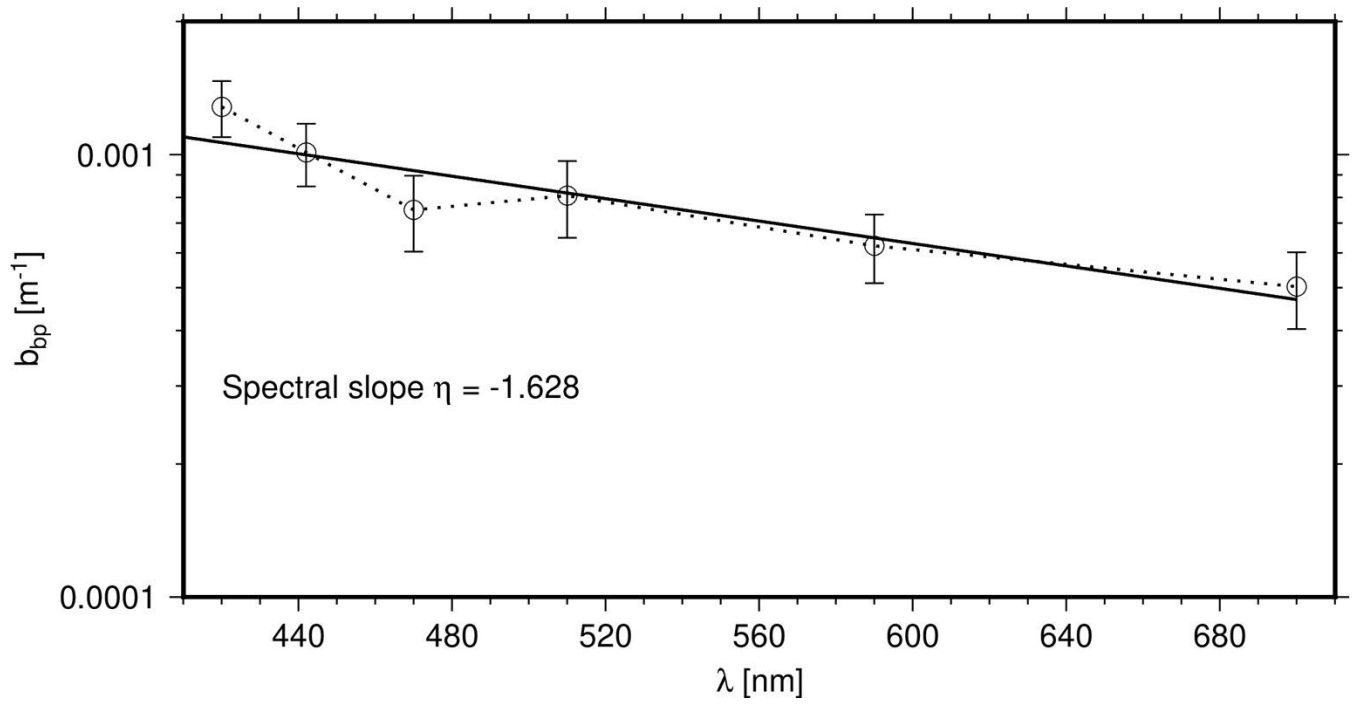

13 **Fig. S1.** Particulate backscattering coefficient at the 6 wavelengths of the Hydroscat-6 instrument. The  
 14 open circles and vertical bars are average values and standard deviation for all data for depths < 150 m. The  
 15 solid black line is the fit of the logarithm of  $b_{bp}$  against wavelength, with the slope reported on the panel.

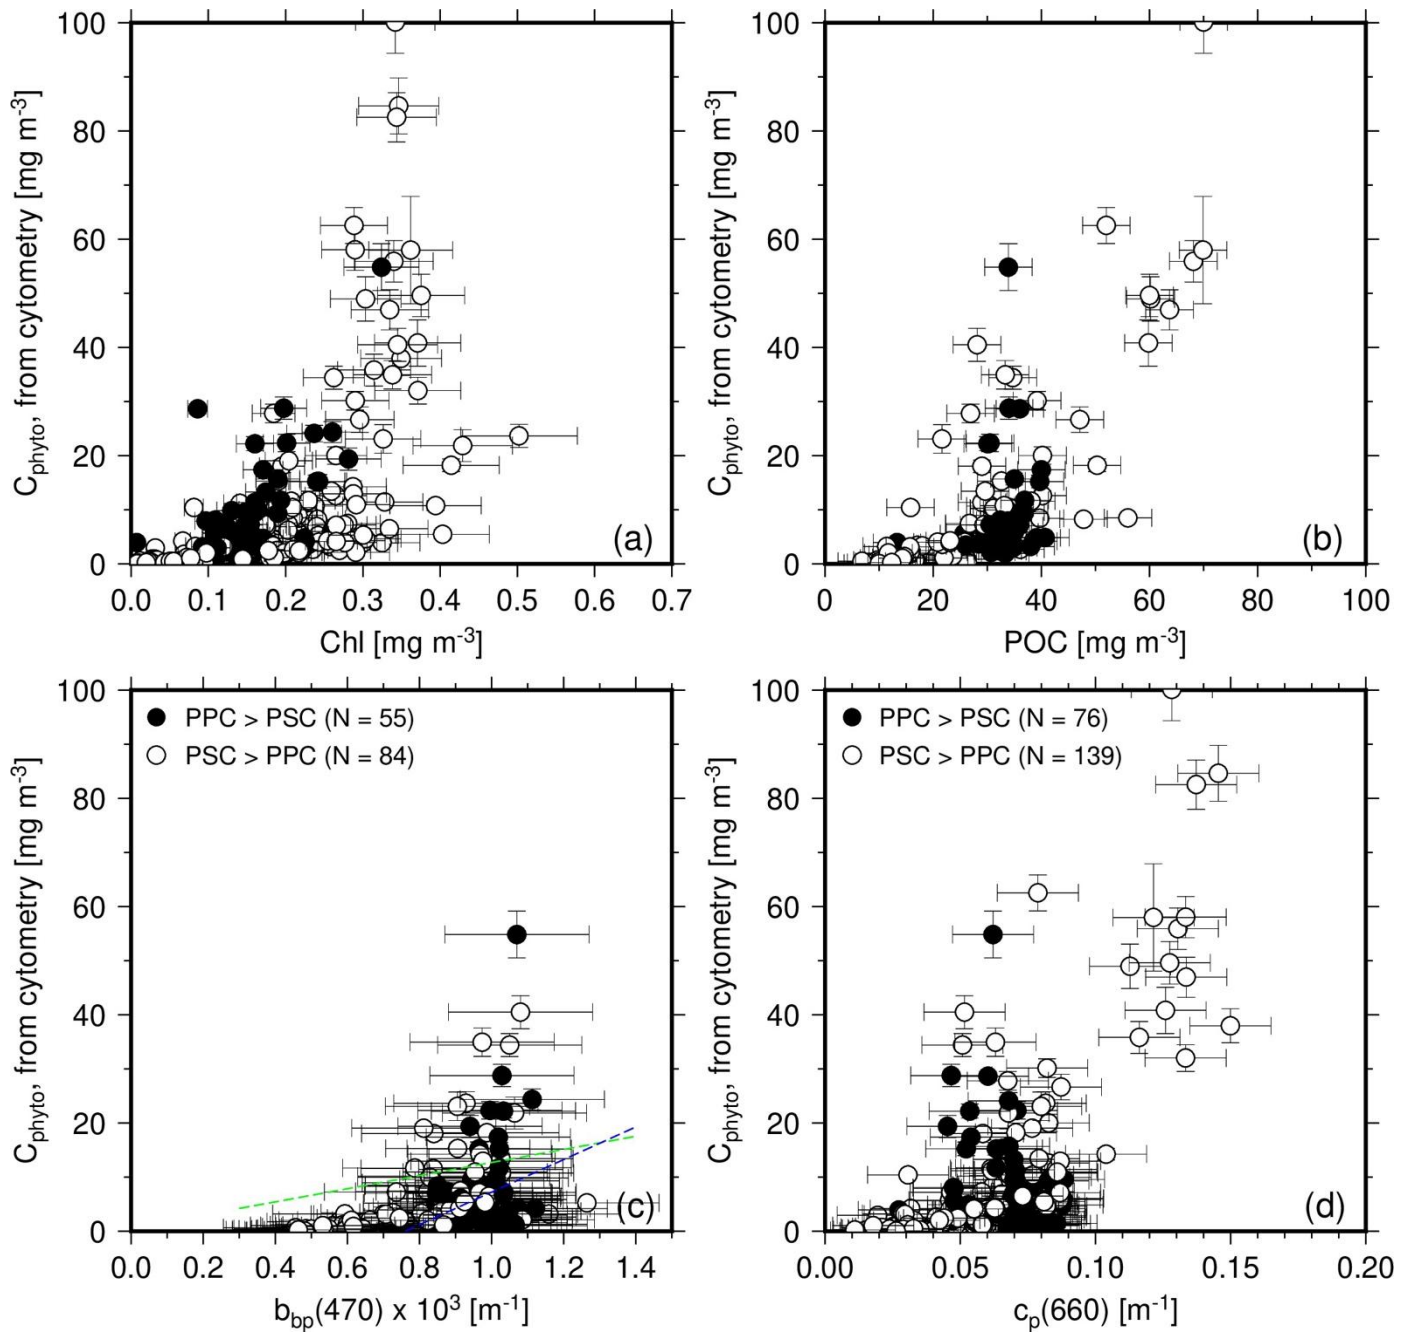

16 **Fig. S2.** The same data as plotted in Fig. 6b,d and Fig7b,d yet using here linear scales.
